# Supplementary material for: First three examples of taxane-derived di-propellanes in Taxus canadensis needlesElectronic supplementary information (ESI) available: experimental and NMR data. See http://www.rsc.org/suppdata/cc/b3/b316051c/
Source: Royal Society of Chemistry journal article supplement (doi:10.1039/b316051c), 2004-01-01
Supplement: b316051c.doc [file b316051c.doc]

General procedurefor isolation and purification of metabolite **A**-**C**:Air-dried needles of *Taxus canadensis* were ground (4.0 kg) and extracted with methanol. The organic extracts were partitioned and chromatographed as described in the previous paper.9  The Fr D-38 to Fr D-41 were combined (24 g) according to their TLC behavior and chromatographed over silica gel (770 g) and eluted with hexane-acetone and yielded 28 fractions (Fr D-38-1 to Fr D-38-28). The fractions Fr D-38-16,Fr D-38-17 and Fr D-38-18 (880 mg) were pooled and was re-chromatographed over silica gel (55 g) eluting with hexane-EtOAc (1:2) to yield 17 fractions (Fr D-38-16-1 to Fr D-38-16-17). The fractions Fr D-38-16-13 (24 mg) and Fr D-38-16-14 (21 mg) were combined and was applied to a preparative HPLC and yielded compound **A** (6 mg, t*R* = 15.89 min) and **C** (4.0 mg, t*R* = 23.20 min). Compound **A**: Amorphous solid; []D22 +140 (*c* 0.06, CHCl3); 1H and 13C NMR spectral data in acetone-D6 see Table S1; 1H NMR data in CDCl3: 2.03 (1H, m, H-1), 5.59 (1H, d, *J* = 5.3 Hz, H-2), 4.28 (1H, dd, *J* = 9.5, 1.4 Hz, H-5), 2.01 (1H, m, H-6a), 1.62 (1H, br.d, *J* = 15.0 Hz, H-6b), 1.84 (1H, td, *J* = 14.2, 5.0 Hz, H-7a), 1.32 (1H, m, H-7b), 4.16 (1H, d, *J* = 9.2 Hz, H-9), 5.30 (1H, d, *J* = 9.2 Hz, H-10), 2.12 (1H, m, H-14a), 1.95 (1H, dd, *J* = 14.2, 2.8 Hz, H-14b), 1.25 (3H, s, Me-16), 1.33 (3H, s, Me-17), 1.22 (3H, s, Me-18), 1.17 (3H, s, Me-19), 2.11 (1H, o.m, H-20a), 2.05 (1H, o.m, H-20b), 2.14 (3H, s, *CH3*CO-2), 2.09 (3H, s, *CH3*CO-10); 13C NMR data in CDCl3: 47.3 (C-1), 77.7 (C-2), 64.9 (C-3), 87.9 (C-4), 65.2 (C-5), 25.6 (C-6), 27.0 (C-7), 41.8 (C-8), 85.6 (C-9), 82.3 (C-10), 63.6 (C-11), 55.3 (C-12), 101.1 (C-13), 33.5 (C-14), 39.5 (C-15), 29.3 (C-16), 23.9 (C-17), 14.5 (C-18), 22.6 (C-19), 47.1 (C-20), 21.2 (*CH3*CO-2), 170.4 (CH3*CO*-2), 21.2 (*CH3*CO-10), 171.7 (CH3*CO*-10); HRFABMS *m/z* 489.1892 [M + K]+ (calcd for C24H34O8K, 489.1891). The fractions Fr D-38-16-10 (34 mg) and Fr D-38-16-11 (30 mg) were combined and was applied to a preparative HPLC, the peak eluted at t*R* = 23.20 min was collected and was further purified by preparative TLC (1  20 20, thickness 0.25 mm), after developing with solvent CH2Cl2-CH3CN = 5:9 compound **B** was yielded in a pure form (2.0 mg, *R*f = 0.30; t*R* = 18.80 min). Amorphous solid; []D22 +131 (*c* 0.01, CHCl3); 1H NMR data in acetone-D6: 1.66 (1H, m, H-1), 4.60 (1H, dd, *J* = 11.9, 5.1 Hz, H-2), 3.89 (1H, d, *J* = 11.9 Hz, 2-OH), 4.14 (1H, br.m, H-5), 3.67 (1H, d, *J* = 3.9 Hz, 5-OH), 2.03 (1H, m, H-6a), 1.55 (1H, m, H-6b), 1.90 (1H, m, H-7a), 1.20 (1H, m, H-7b), 5.44 (1H, d, *J* = 9.3 Hz, H-9), 5.58 (1H, d, *J* = 9.3 Hz, H-10), 5.14 (1H, s, 13-OH), 2.18 (1H, m, H-14a), 1.98 (1H, o.m, H-14b), 1.25 (3H, s, Me-16), 1.32 (3H, s, Me-17), 1.18 (3H, s, Me-18), 1.28 (3H, s, Me-19), 2.16 (1H, o.m, H-20a), 1.98 (1H, o.m, H-20b), 2.02 (3H, s, *CH3*CO-9), 1.95 (3H, s, *CH3*CO-10); 13C NMR data in acetone-D6: 50.5 (C-1), 77.6 (C-2), 65.0 (C-3), 88.9 (C-4), 65.1 (C-5), 26.7 (C-6), 27.9 (C-7), 40.6 (C-8), 85.2 (C-9), 77.7 (C-10), 63.6 (C-11), 54.4 (C-12), 101.6 (C-13), 32.8 (C-14), 38.2 (C-15), 23.3 (C-16), 28.4 (C-17), 14.0 (C-18), 22.2 (C-19), 46.4 (C-20), 20.0 (*CH3*CO-9), 169.2 (CH3*CO*-9), 19.7 (*CH3*CO-10), 169.8 (CH3*CO*-10); 1H and 13C NMR spectral data in CDCl3 1.76 (1H, m, H-1), 4.67 (1H, dd, *J* = 11.9, 5.1 Hz, H-2), 3.95 (1H, d, *J* = 11.9 Hz, 2-OH), 4.31 (1H, dd, *J* = 9.5, 2.5 Hz, H-5), 2.11 (1H, m, H-6a), 1.59 (1H, m, H-6b), 1.93 (1H, m, H-7a), 1.23 (1H, m, H-7b), 5.43 (1H, d, *J* = 9.2 Hz, H-9), 5.55 (1H, d, *J* = 9.2 Hz, H-10), 2.22 (1H, dd, *J* = 14.3, 2.4 Hz, H-14a), 2.05 (1H, o.m, H-14b), 1.23 (3H, s, Me-16), 1.34 (3H, s, Me-17), 1.19 (3H, s, Me-18), 1.29 (3H, s, Me-19), 2.11 (1H, o.m, H-20a), 2.04 (1H, o.m, H-20b), 2.00 (3H, s, *CH3*CO-9), 2.04 (3H, s, *CH3*CO-10); 50.1 (C-1), 78.0(C-2), 65.0 (C-3), 89.4 (C-4), 65.4 (C-5), 25.8 (C-6), 28.2 (C-7), 41.0 (C-8), 85.1 (C-9), 77.7 (C-10), 63.9 (C-11), 55.0 (C-12), 102.5 (C-13), 32.7 (C-14), 38.9 (C-15), 23.7 (C-16), 28.9 (C-17), 14.3 (C-18), 22.4 (C-19), 46.2 (C-20), 20.6 (*CH3*CO-9), 170.5 (CH3*CO*-9), 21.0 (*CH3*CO-10), 169.8 (CH3*CO*-10); HRFABMS *m/z* 473.2164 [M + Na]+ (calcd for C24H34O8Na, 473.2151), 489.1888 [M + K]+ (calcd for C24H34O8K, 489.1891). Compound **C**: Amorphous solid; []D22 +113 (*c* 0.01, CHCl3); 1H NMR data in acetone-D6: 1.96 (1H, m, H-1), 5.63 (1H, d, *J* = 5.0 Hz, H-2), 4.23 (1H, m, H-5), 3.50 (1H, br. 5-OH), 1.95 (1H, m, H-6a), 1.54 (1H, m, H-6b), 1.95 (1H, m, H-7a), 1.18 (1H, m, H-7b), 5.43 (1H, d, *J* = 9.2 Hz, H-9), 5.63 (1H, d, *J* = 9.2 Hz, H-10), 4.77 (1H, 13-OH), 2.07 (1H, m, H-14a), 1.87 (1H, o.m, H-14b), 1.26 (3H, s, Me-16), 1.43 (3H, s, Me-17), 1.19 (3H, s, Me-18), 1.15 (3H, s, Me-19), 2.15 (1H, d, *J* = 11.7 Hz, H-20a), 1.99 (1H, d, *J* = 11.7 Hz, H-20b), 2.04 (3H, s, *CH3*CO-2), 2.01 (3H, s, *CH3*CO-9), 2.03 (3H, s, *CH3*CO-10); 13C NMR data in acetone-D6: 48.5 (C-1), 78.3 (C-2), 66.3 (C-3), 88.2 (C-4), 65.6 (C-5), 27.2 (C-6), 28.4 (C-7), 42.2 (C-8), 86.0 (C-9), 78.3 (C-10), 64.7 (C-11), 56.4 (C-12), 101.3 (C-13), 34.1 (C-14), 40.6 (C-15), 24.1 (C-16), 29.3 (C-17), 14.8 (C-18), 23.0 (C-19), 47.7 (C-20), 20.7 (*CH3*CO-2), 170.4 (CH3*CO*-2), 21.0 (*CH3*CO-9), 171.0 (CH3*CO*-9), 20.4 (*CH3*CO-10), 171.0 (CH3*CO*-10); HRFABMS *m/z* 531.1997 [M + K]+ (calcd for C26H36O9K, 531.1996).

**Table S1**. 1H and 13C NMR spectral data of **A** in acetone-D6 (500 MHz for 1H, 125 MHz for 13C).

| Position |  (H) multa | *J* (Hz) |  (C)b | HMBC | NOESYc |
| --- | --- | --- | --- | --- | --- |
| 1 | 1.93 (o.m) |  | 47.8 |  | 2,m 16,m 17m |
| 2 | 5.60 (d) | 5.3 | 77.6 | 1, 3, 4, 8, 14, **169.7** | 1,m 17,s 19s |
| 3 | -- |  | **65.1** |  |  |
| 4 | -- |  | **87.4** |  |  |
| 5 5-OH | 4.23 (ddd) 3.48 (br.d) | 9.0, 2.5, 2.4 2.5 | 64.9 | 4, 6, 7, 20 4, 5, 6 | 6a/7a,s 19,w OH-5m 5,m OHs (-) NOEs |
| 6a (axial) 6b (eq) | 2.01 (o.m) 1.55 (m) |  | 25.6 | 3, 4, 7, 8 | 6a/7a,s 5w |
| 7a (axial) 7b (eq) | 1.94 (o.m) 1.27 (o.m) |  | 27.0 | 3, 8, 19 |  |
| 8 | -- |  | **41.2** |  |  |
| 9 9-OH | 4.13 (o.m) 4.11 (o.d) |  | 85.0 | 7, 8, 10, 19 9 | 17,s 19s 10,w OHs (-) NOEs |
| 10 | 5.47 (d) | 9.0 | 80.4 | 8, 9, 11, 12, 15, **169.4** | 7a/6a,w 18,m 20bs |
| 11 | -- |  | **63.5** |  |  |
| 12 | -- |  | **55.1** |  |  |
| 13 13-OH | -- 4.75 (s) |  | **100.4** | 12, 13, 14 | 18,w OHs (-) NOEs |
| 14a 14b | 2.09 (o.m) 1.90 (dd) | 13.4, 3.4 | 33.4 | 1, 2, 12, 13, 15 |  |
| 15 | -- |  | **39.5** |  |  |
| 16 | 1.23 (s) |  | 23.4 | 1, 11, 15, 17 | 1,m 14a,s 17s |
| 17 | 1.34 (s) |  | 28.9 | 1, 11, 15, 16 | 1,m 2,s 9,s 16,s 19w |
| 18 | 1.20 (s) |  | 14.2 | 11, 12, 13, 20 | 10,w OH-13w |
| 19 | 1.14 (s) |  | 22.1 | 3, 7, 8, 9 | 2,s 5,w 6a/7a,s 9,s 7b,s 17s |
| 20a 20b | 2.11 (d) 2.00 (d) | 11.4 11.4 | 46.8 | 2, 3, 4, 5, 11, 12, 13, 18 | 18,s 20b,s OH-5,w OH-13w |
| 2-OAc  10-OAc | 2.07 (s)  2.01 (s) |  | 20.2  169.7 20.3  169.4 | 169.7  169.4 |  |

a Mutiplicity: s, singlet; d, doublet; dd, doublet of doublets; ddd, doublets of doublets of doublets; m, mutiplet;

br., broad; o, overlapped. b 13C chemical shifts were extracted from the HMQC experiment (± 0.2 ppm). The

numbers in bold character represent quaternary carbons whose chemical shifts were obtained from the HMBC

experiment (± 0.2 ppm). c NOESY intensities are marked as strong (s), medium (m), or weak (w).
